# Supplementary material for: Evaluating the effect of COVID-19 on dispensing patterns: a national cohort analysis
Source: Research Square preprint supplement (doi:10.21203/rs.3.rs-233848/v1), 2021-02-24

**Supplementary materials**

**Evaluating the effect of COVID-19 on dispensing patterns: a national cohort analysis**

Authorship list

Fatemeh Torabi*: Population Data Science and Health Data Research UK, Swansea University

Ashley Akbari*: Population Data Science and Health Data Research UK, Swansea University

Laura North: Population Data Science and Health Data Research UK, Swansea University

Daniel Harris: Population Data Science and Health Data Research UK, Swansea University

Gareth Davies: Population Data Science and Health Data Research UK, Swansea University

Mike Gravenor: Swansea University

Rowena Griffiths: Population Data Science and Health Data Research UK, Swansea University

Jane Lyons: Population Data Science and Health Data Research UK, Swansea University

Neil Jenkins: NHS Wales Shared Services Partnership

Andrew Morris: Swansea University

Julian Halcox: Population Data Science and Health Data Research UK, Swansea University

Ronan A. Lyons: Population Data Science and Health Data Research UK, Swansea University

* Lead Author(s)

# Supplementary information

Supplementary Figure 1

*1. a: Mapping of DM+D codes from WDDS to BNF codes*
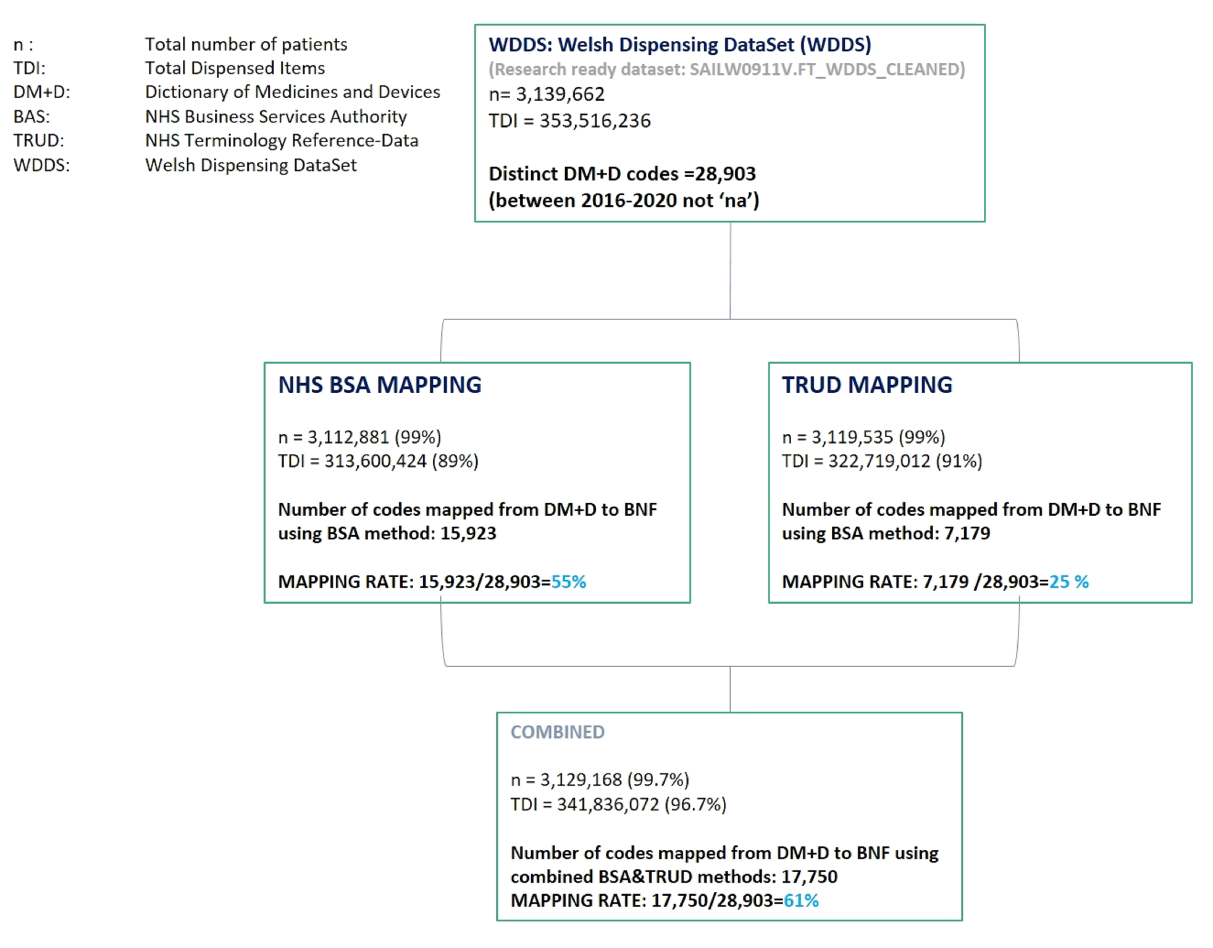


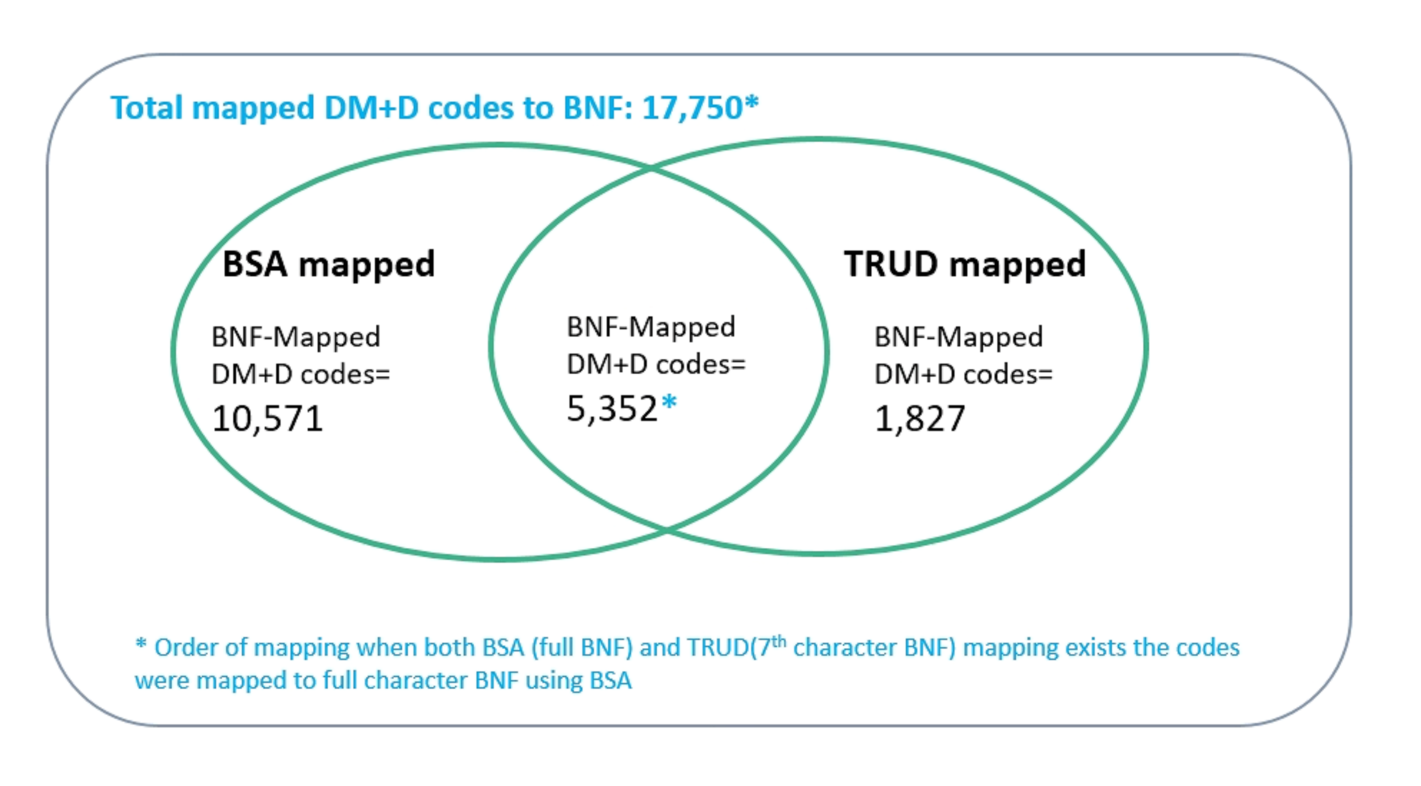


*1.b: Number of dispensed items for individuals residing in Wales and linked to WDDS*


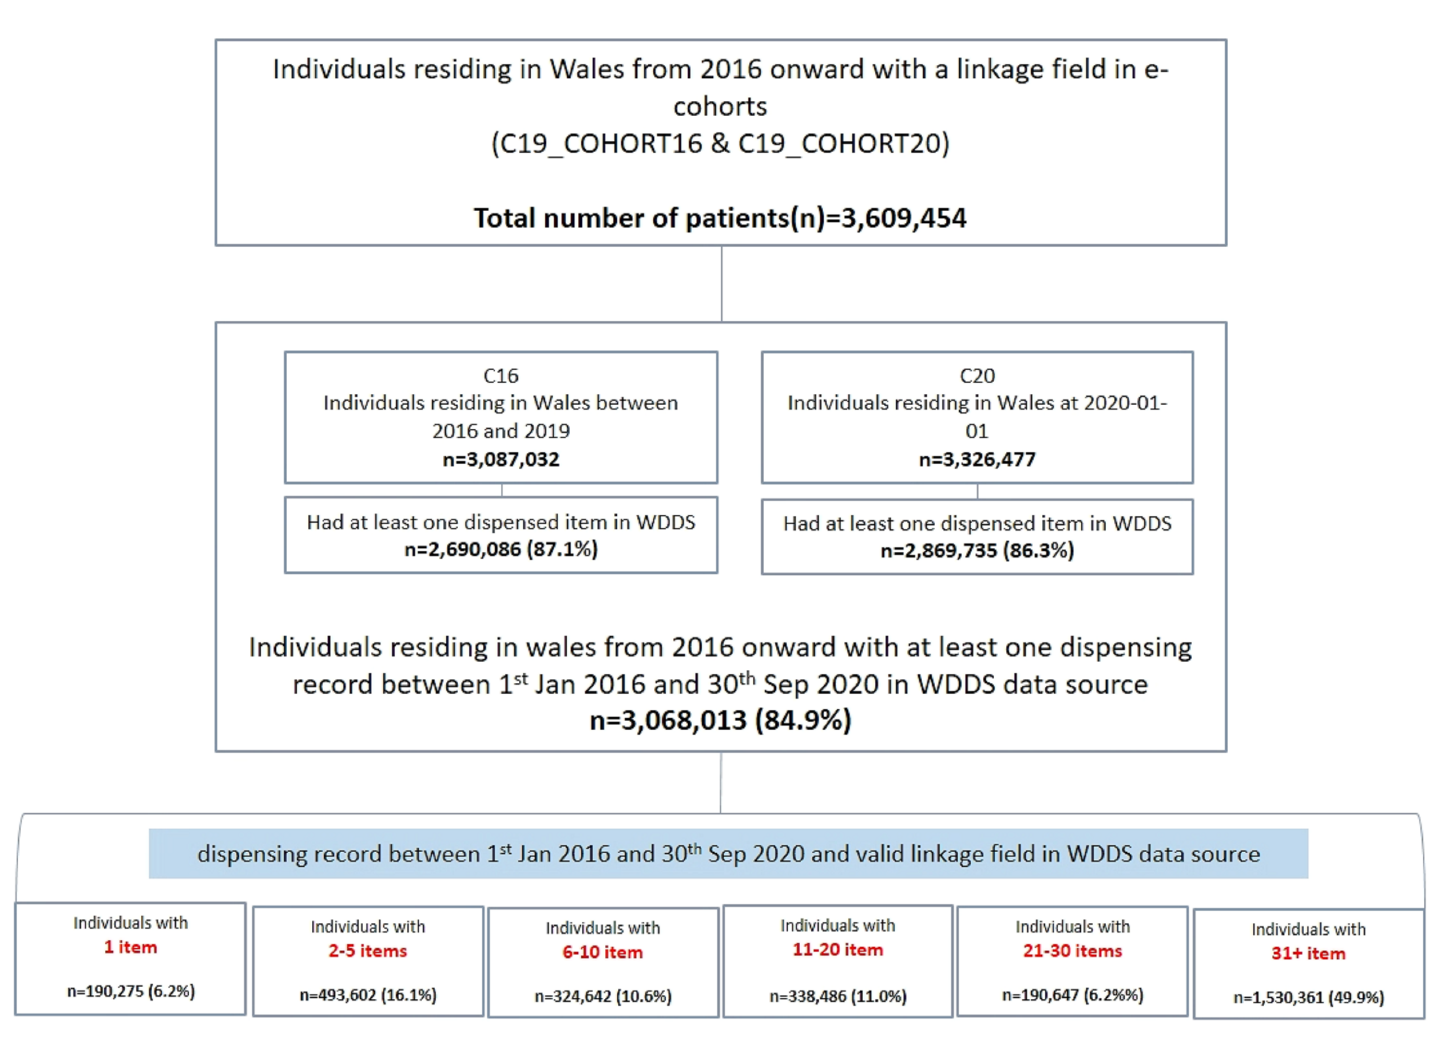


**List of abbreviations**

| Full term | Abbreviation |
| --- | --- |
| D | Difference |
| RC | Relative Change |
| WDDS | Welsh Dispensing DataSet |
| C16 | Electronic cohort for period of 2016-2019 (3) |
| C20 | Electronic cohort for 2020 |
| WDDS | Welsh Dispensing DataSet |
| CVS | Cardiovascular Systems |
| CNS | Central Nervous Systems |
| IVP | Immunological Products and Vaccines |
| NHS TRUD | Terminology Reference-Data Update Distribution |
| NHS BSA | NHS Business Services Authority |
| TDI | Total Dispensed Items |
| DM+D | Dictionary of medicines and devices |
| BNF | British National Formulary |
| Pop’n | Population |

## Supplementary Figure 2.1- Number of dispensed items per BNF chapter-**2020 vs 2019 harmonized scale**

####
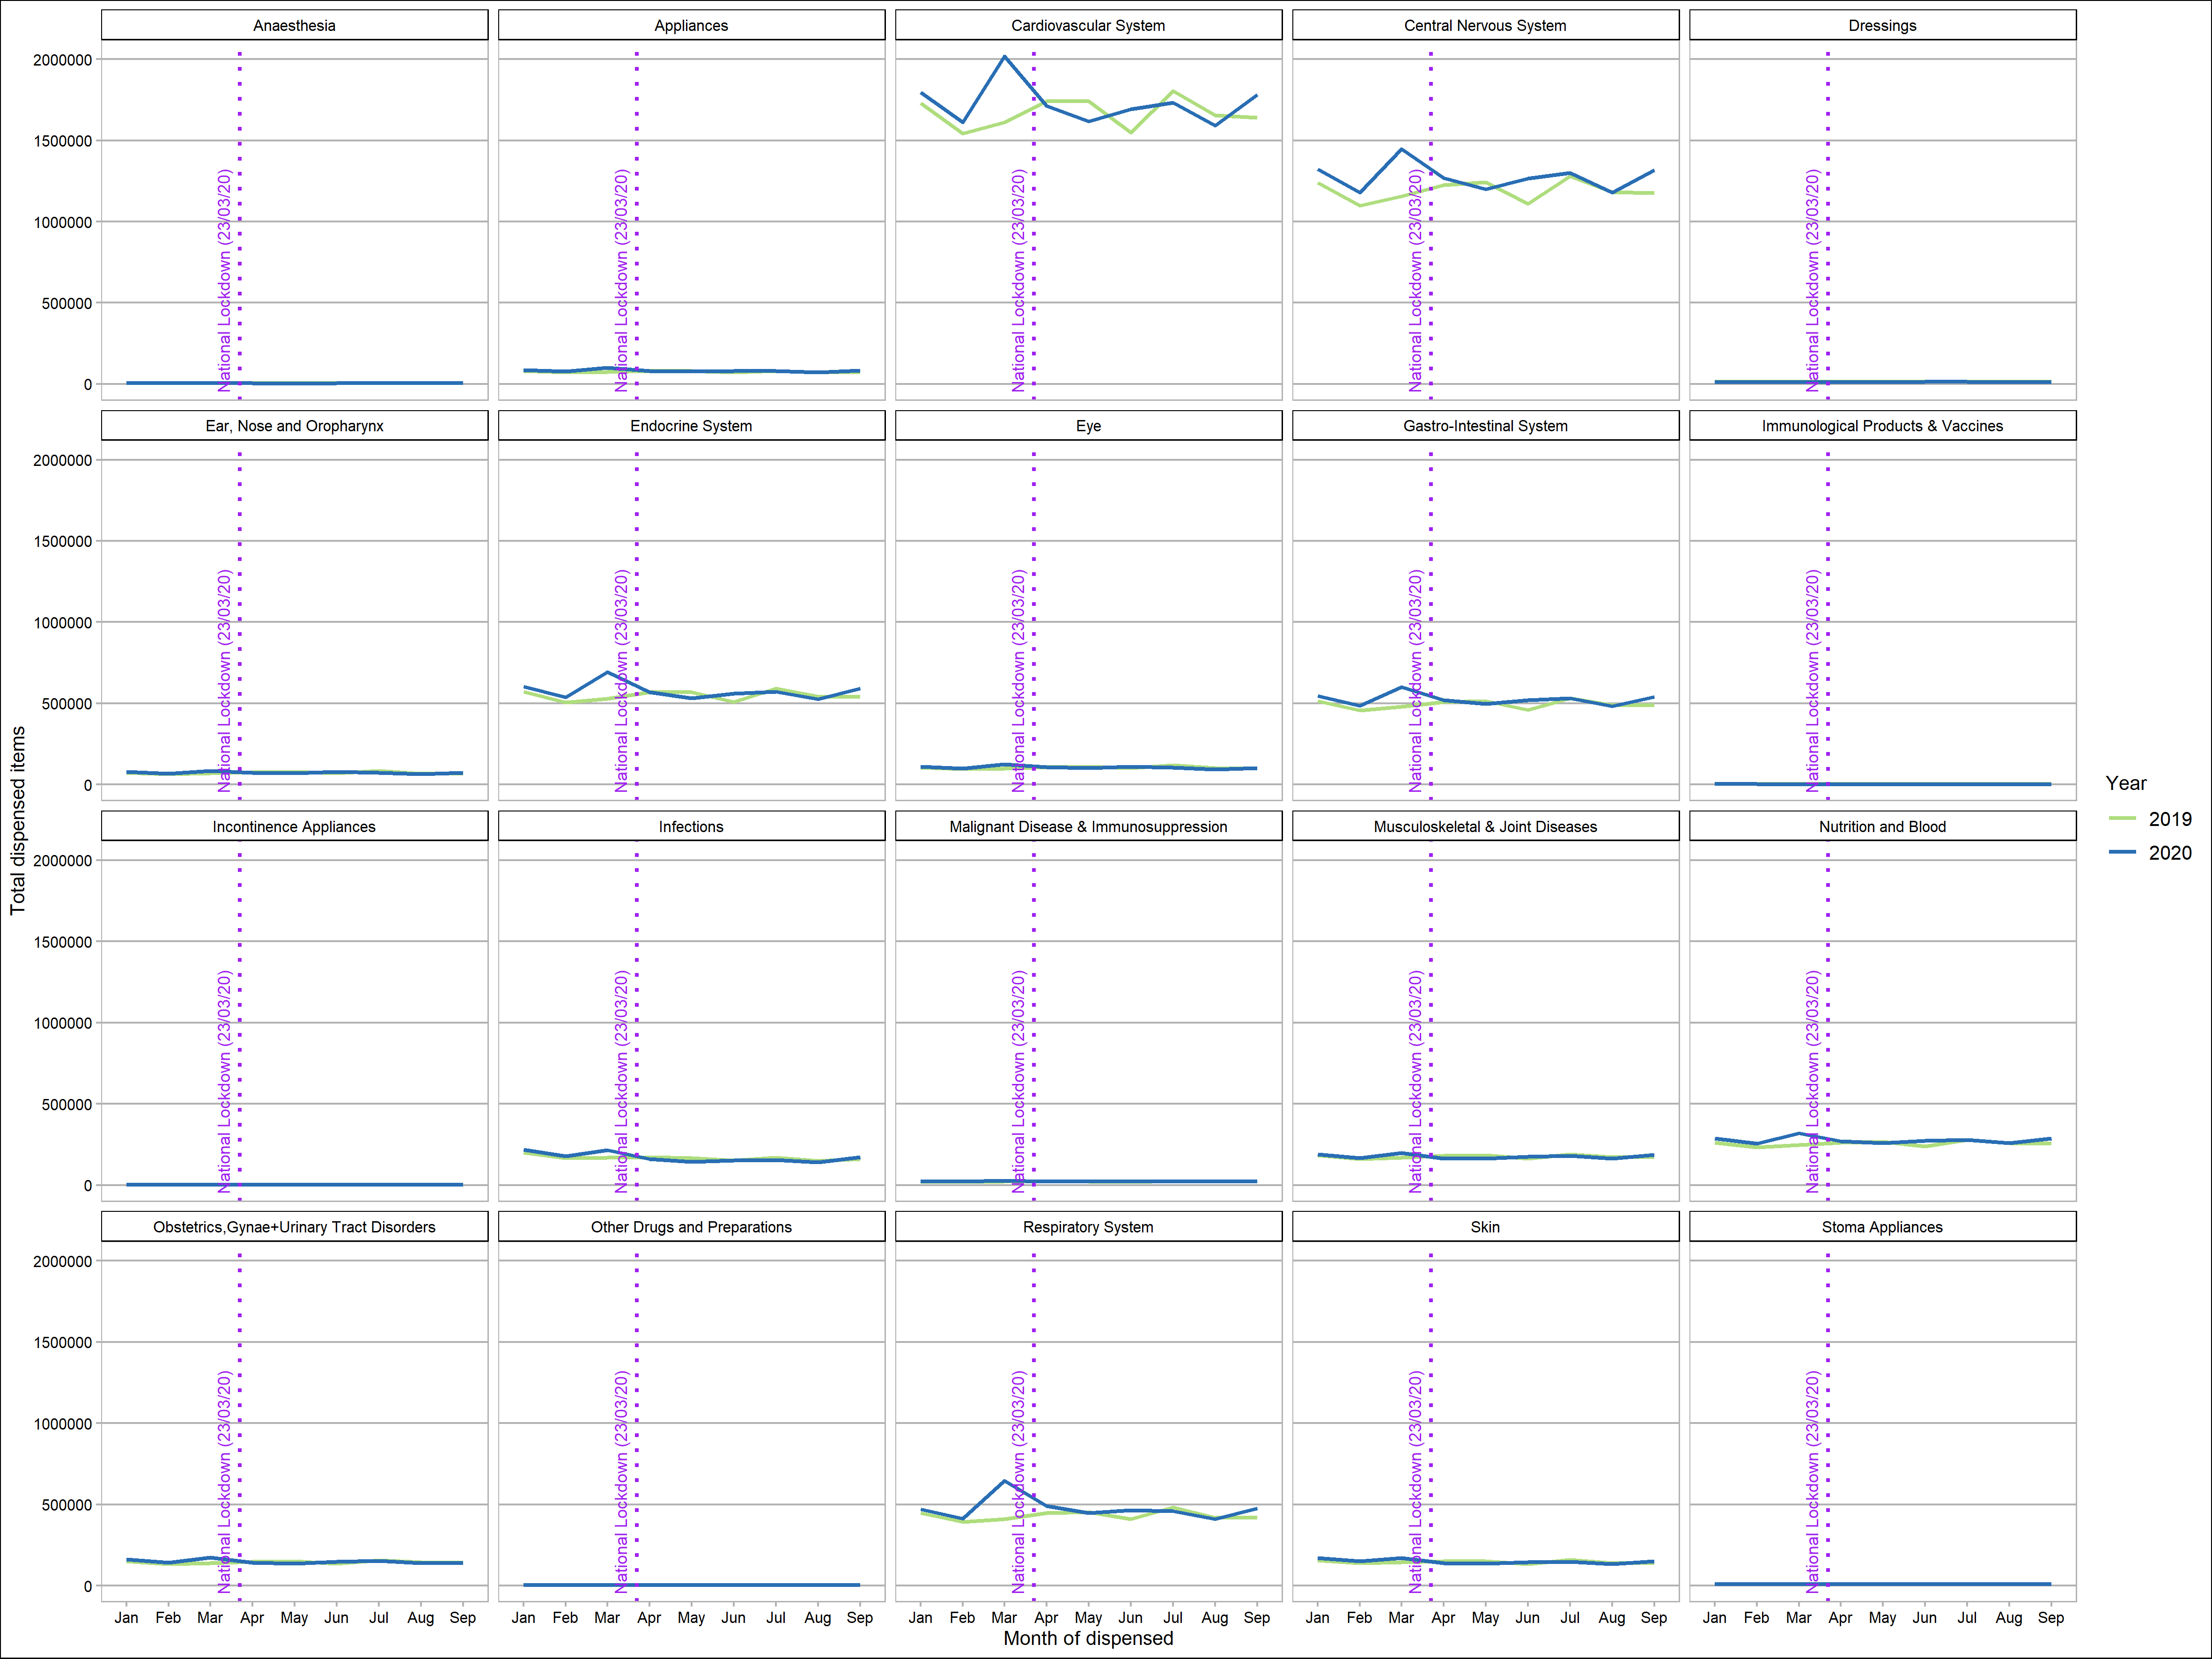


#### Supplementary Figure 2.2- Number of dispensed items per BNF chapter per month –**in all years (numbers of each chapter are individually scaled)**

####
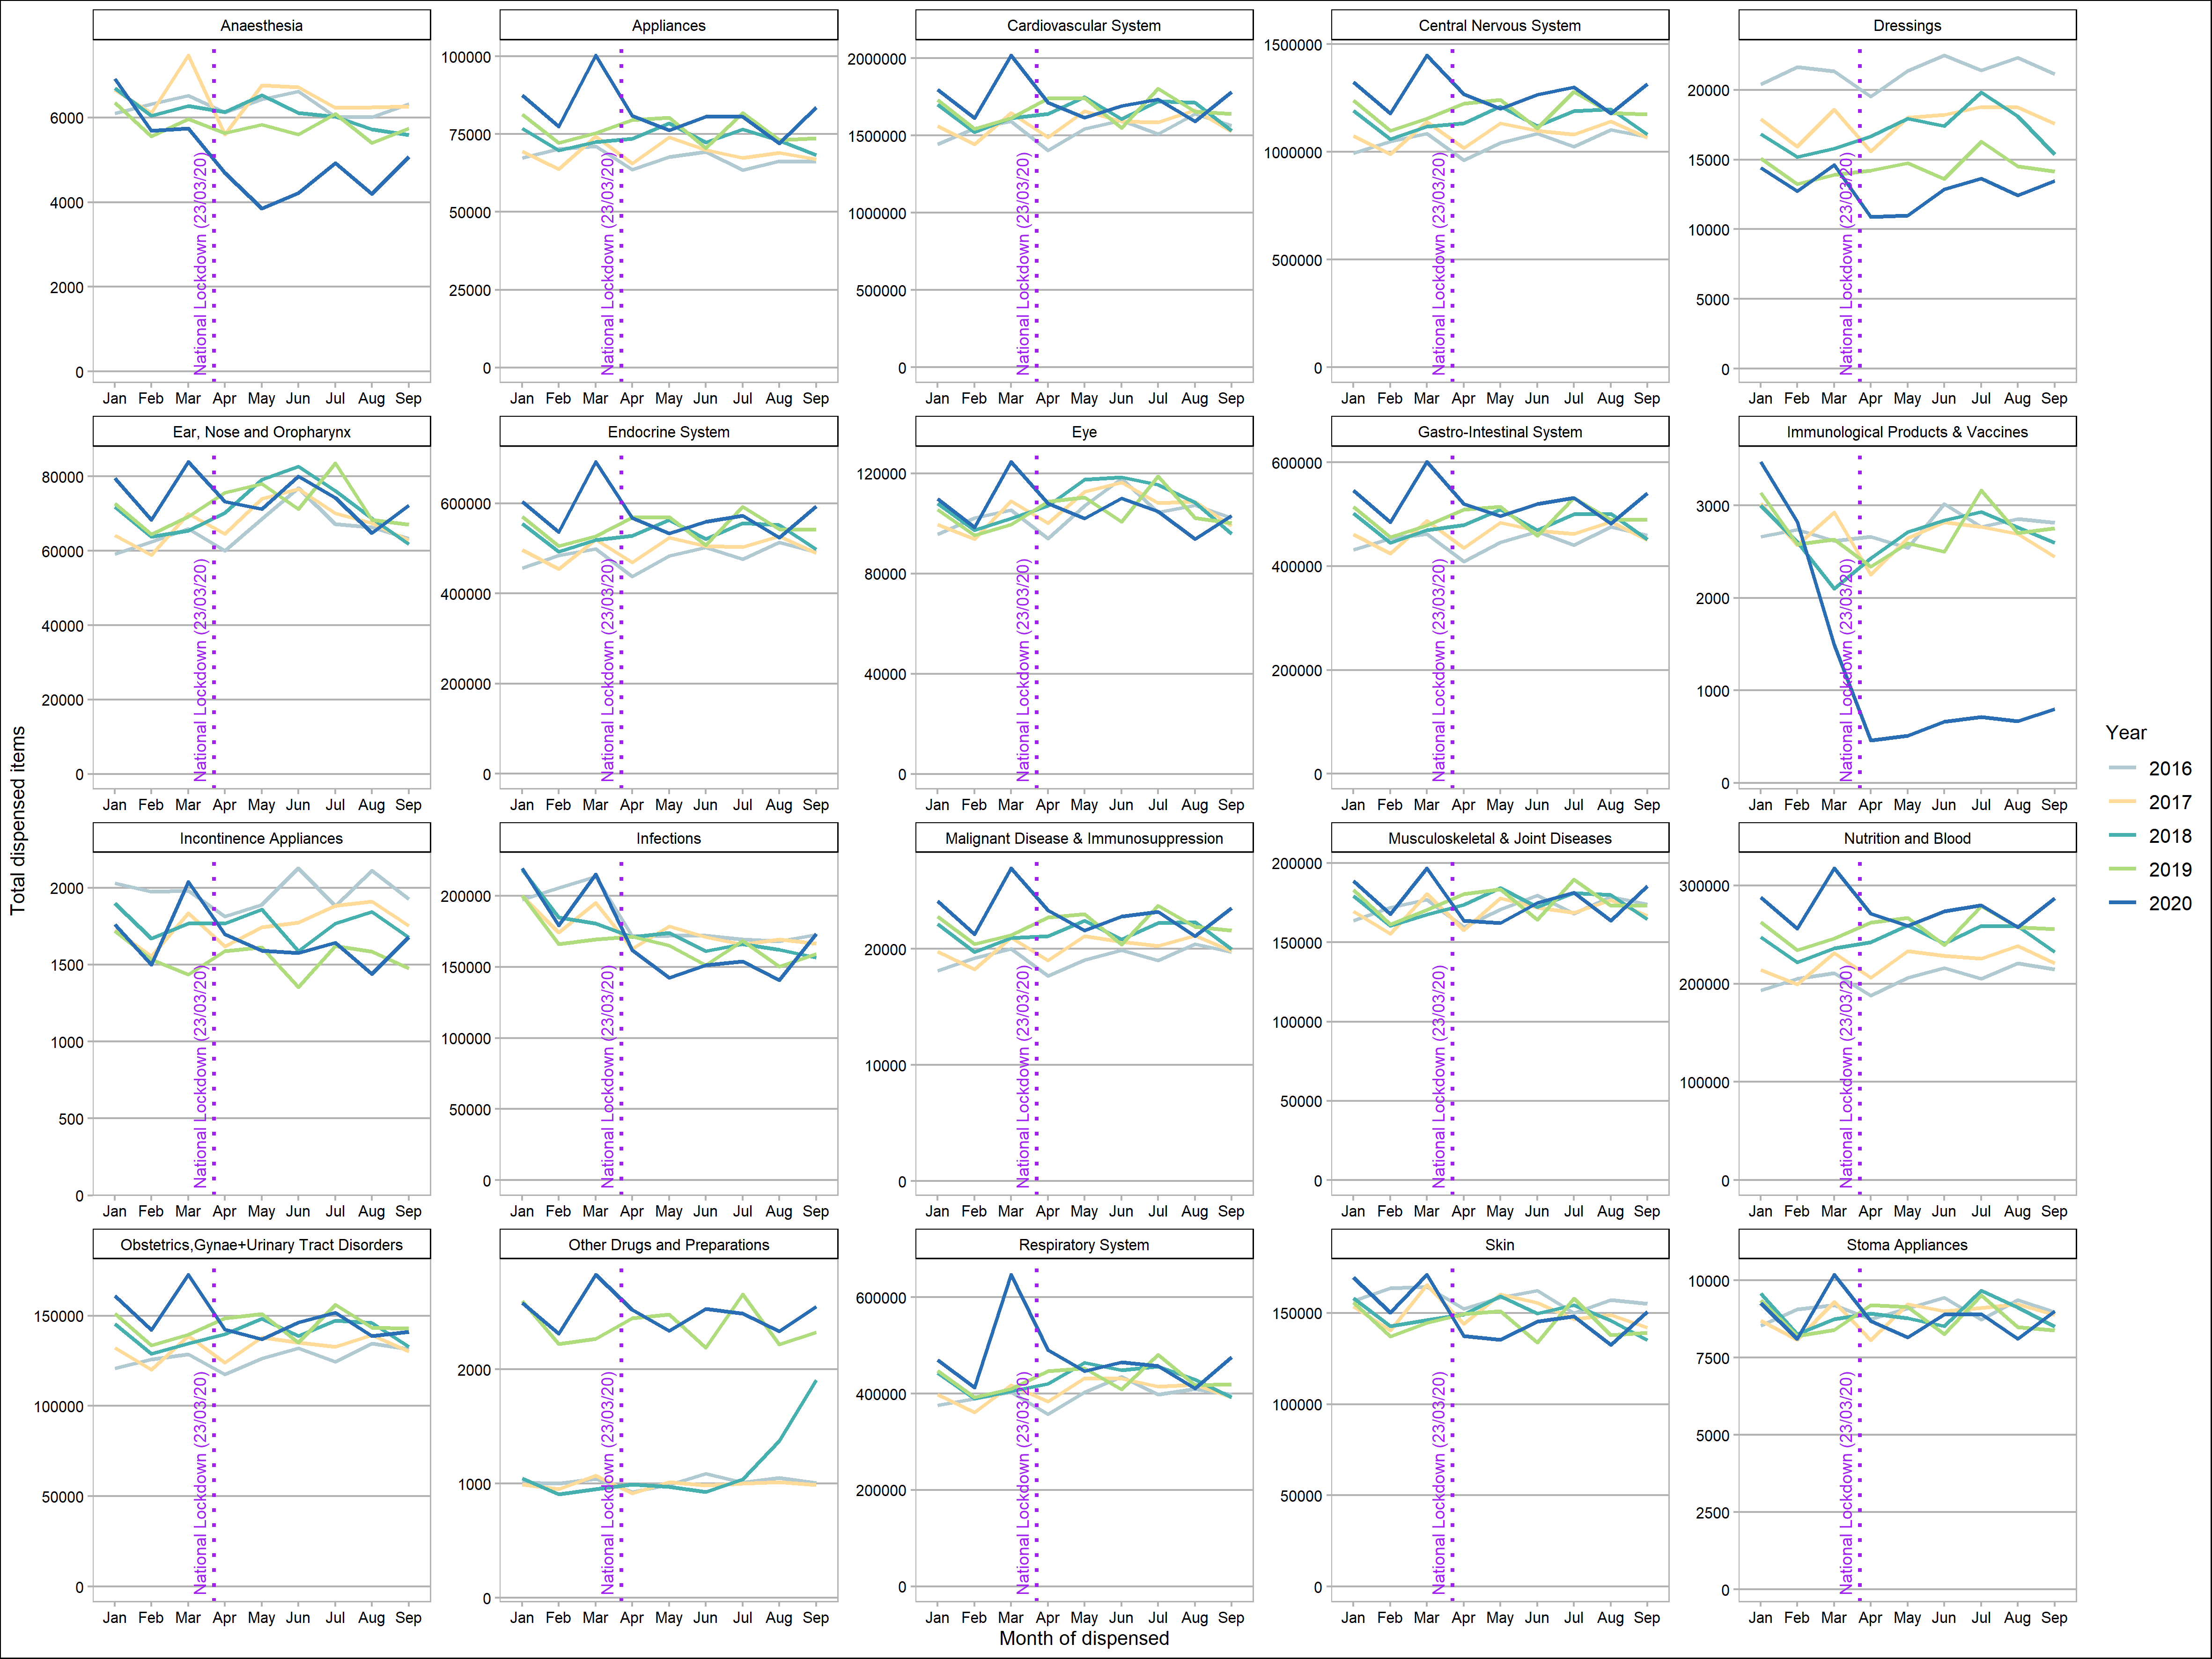


#### Supplementary Figure 2.3- Number of dispensed items per BNF chapter per month –**in all years - harmonized scale**


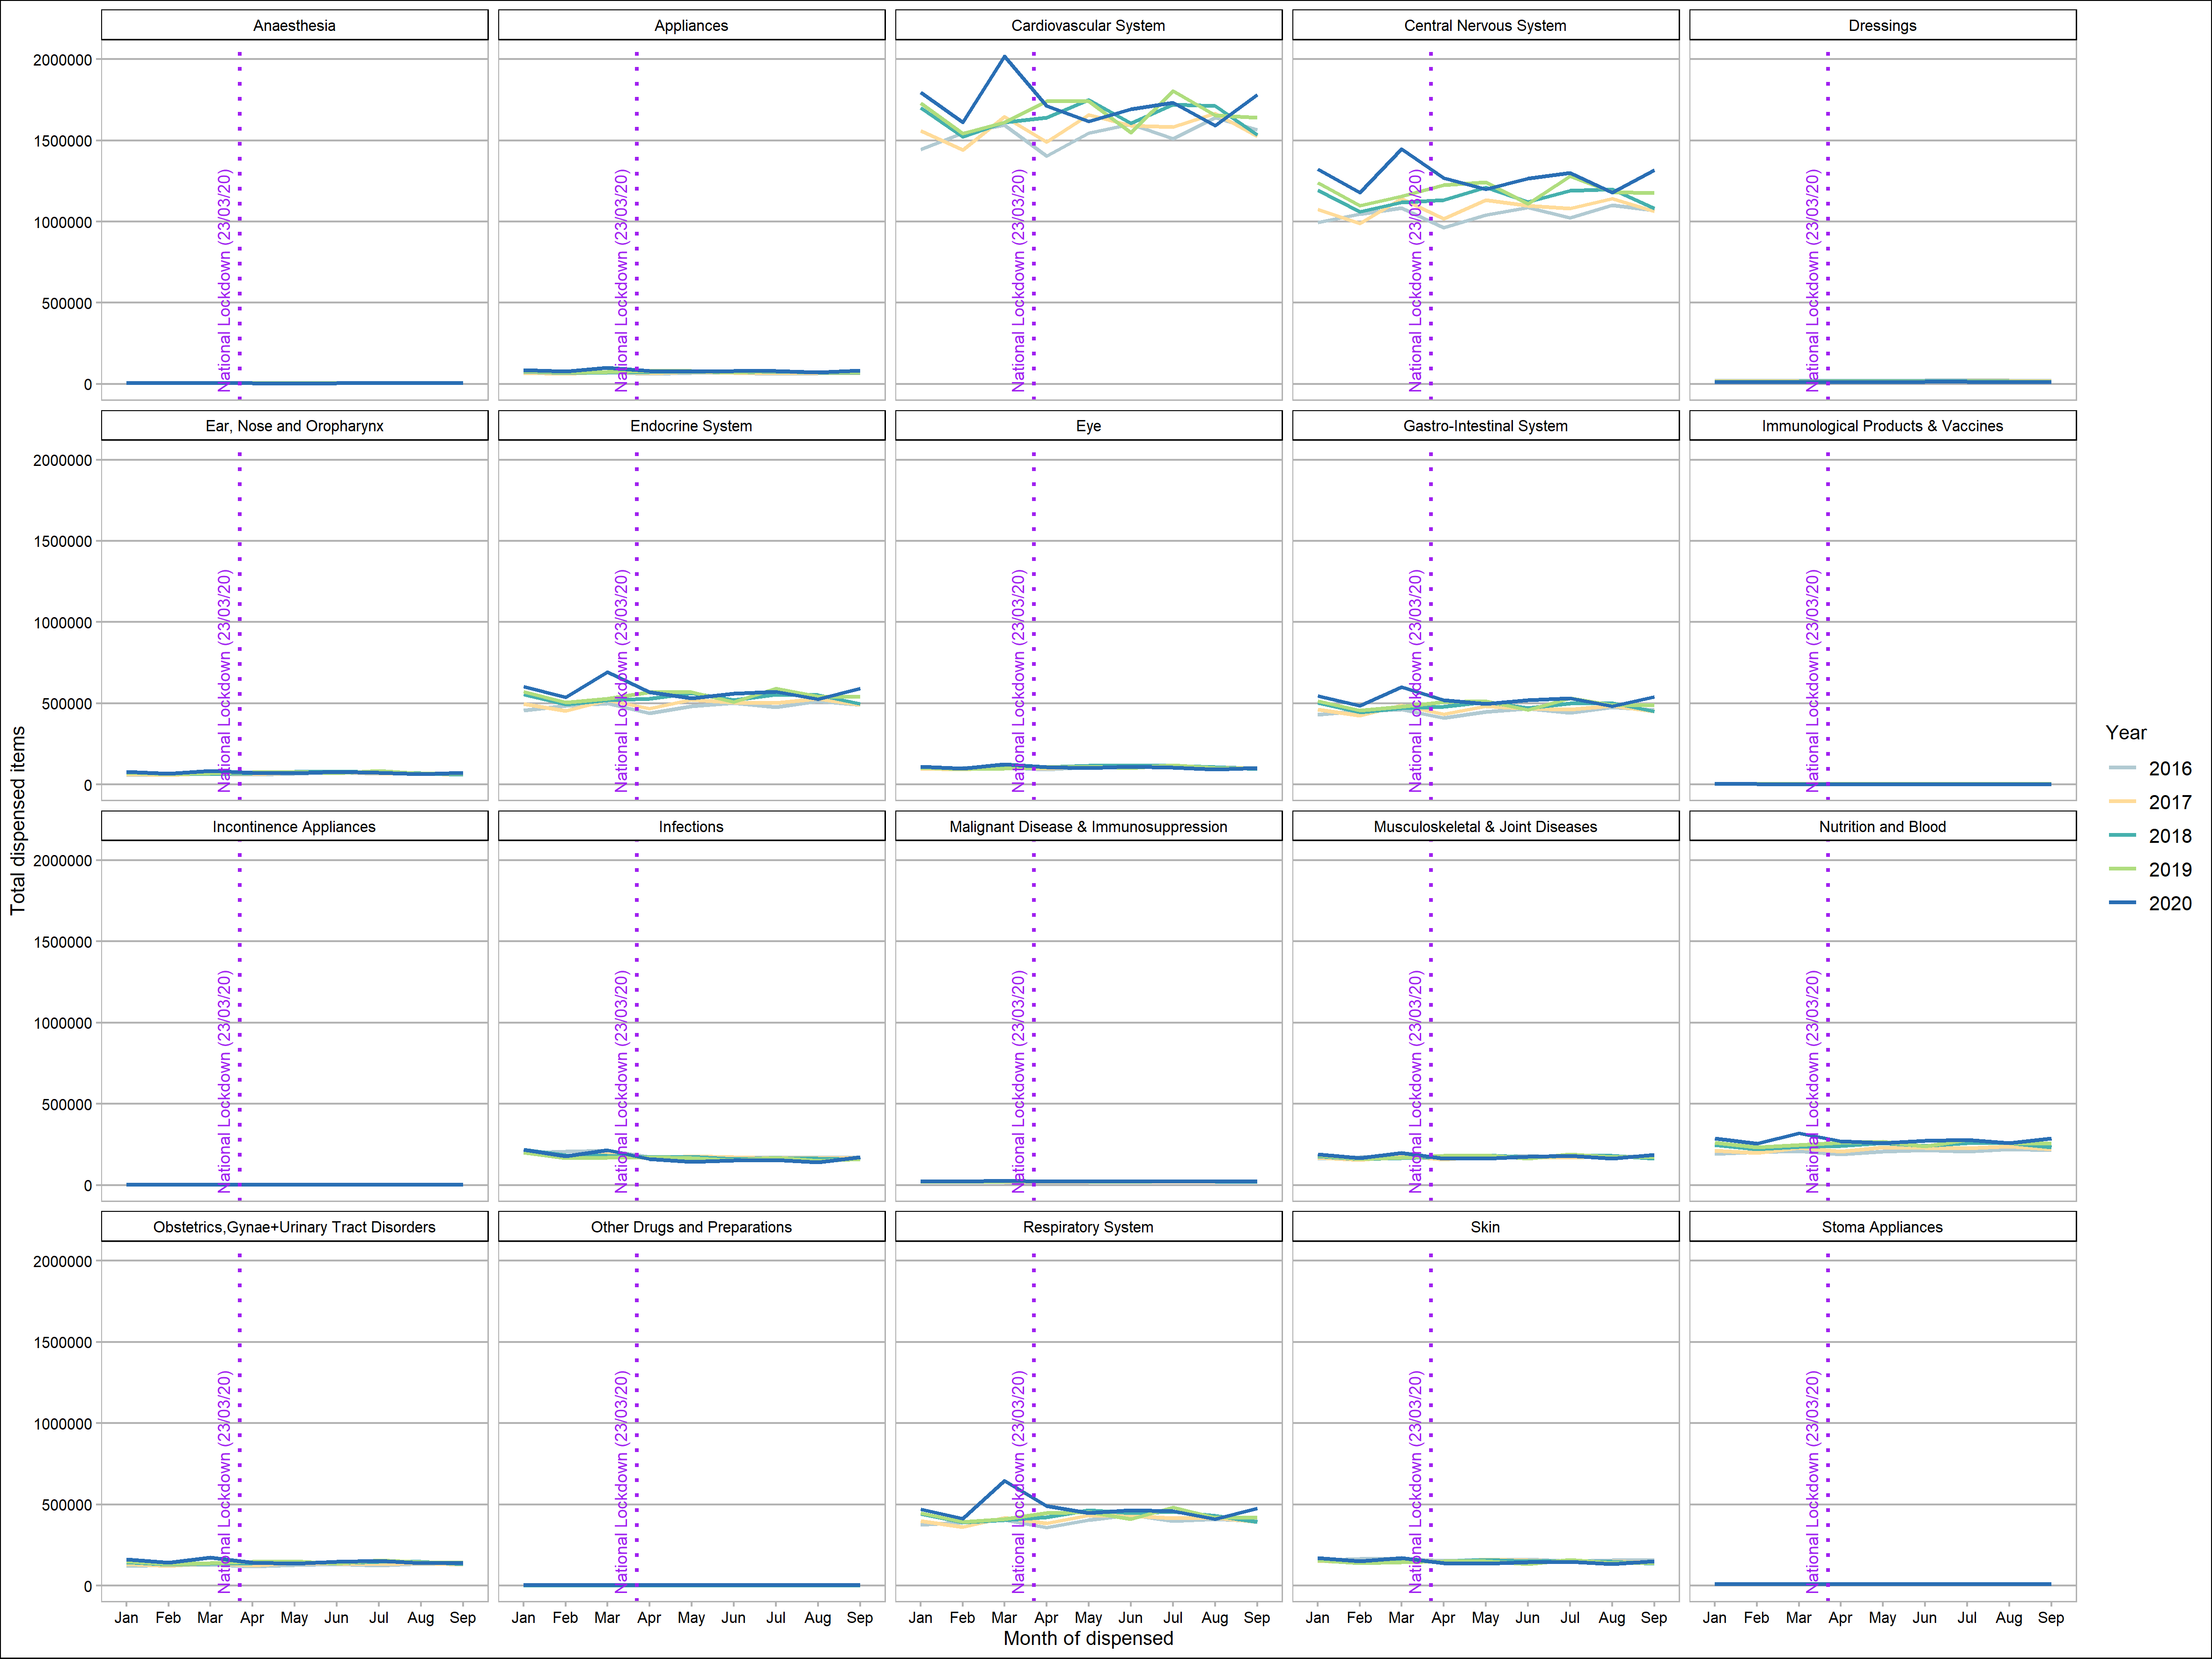


*Supplementary Figure 3.1-**Age-standardized dispensing rates for* ***cardiovascular system*** *in per 100,000 pop’n per year and month*
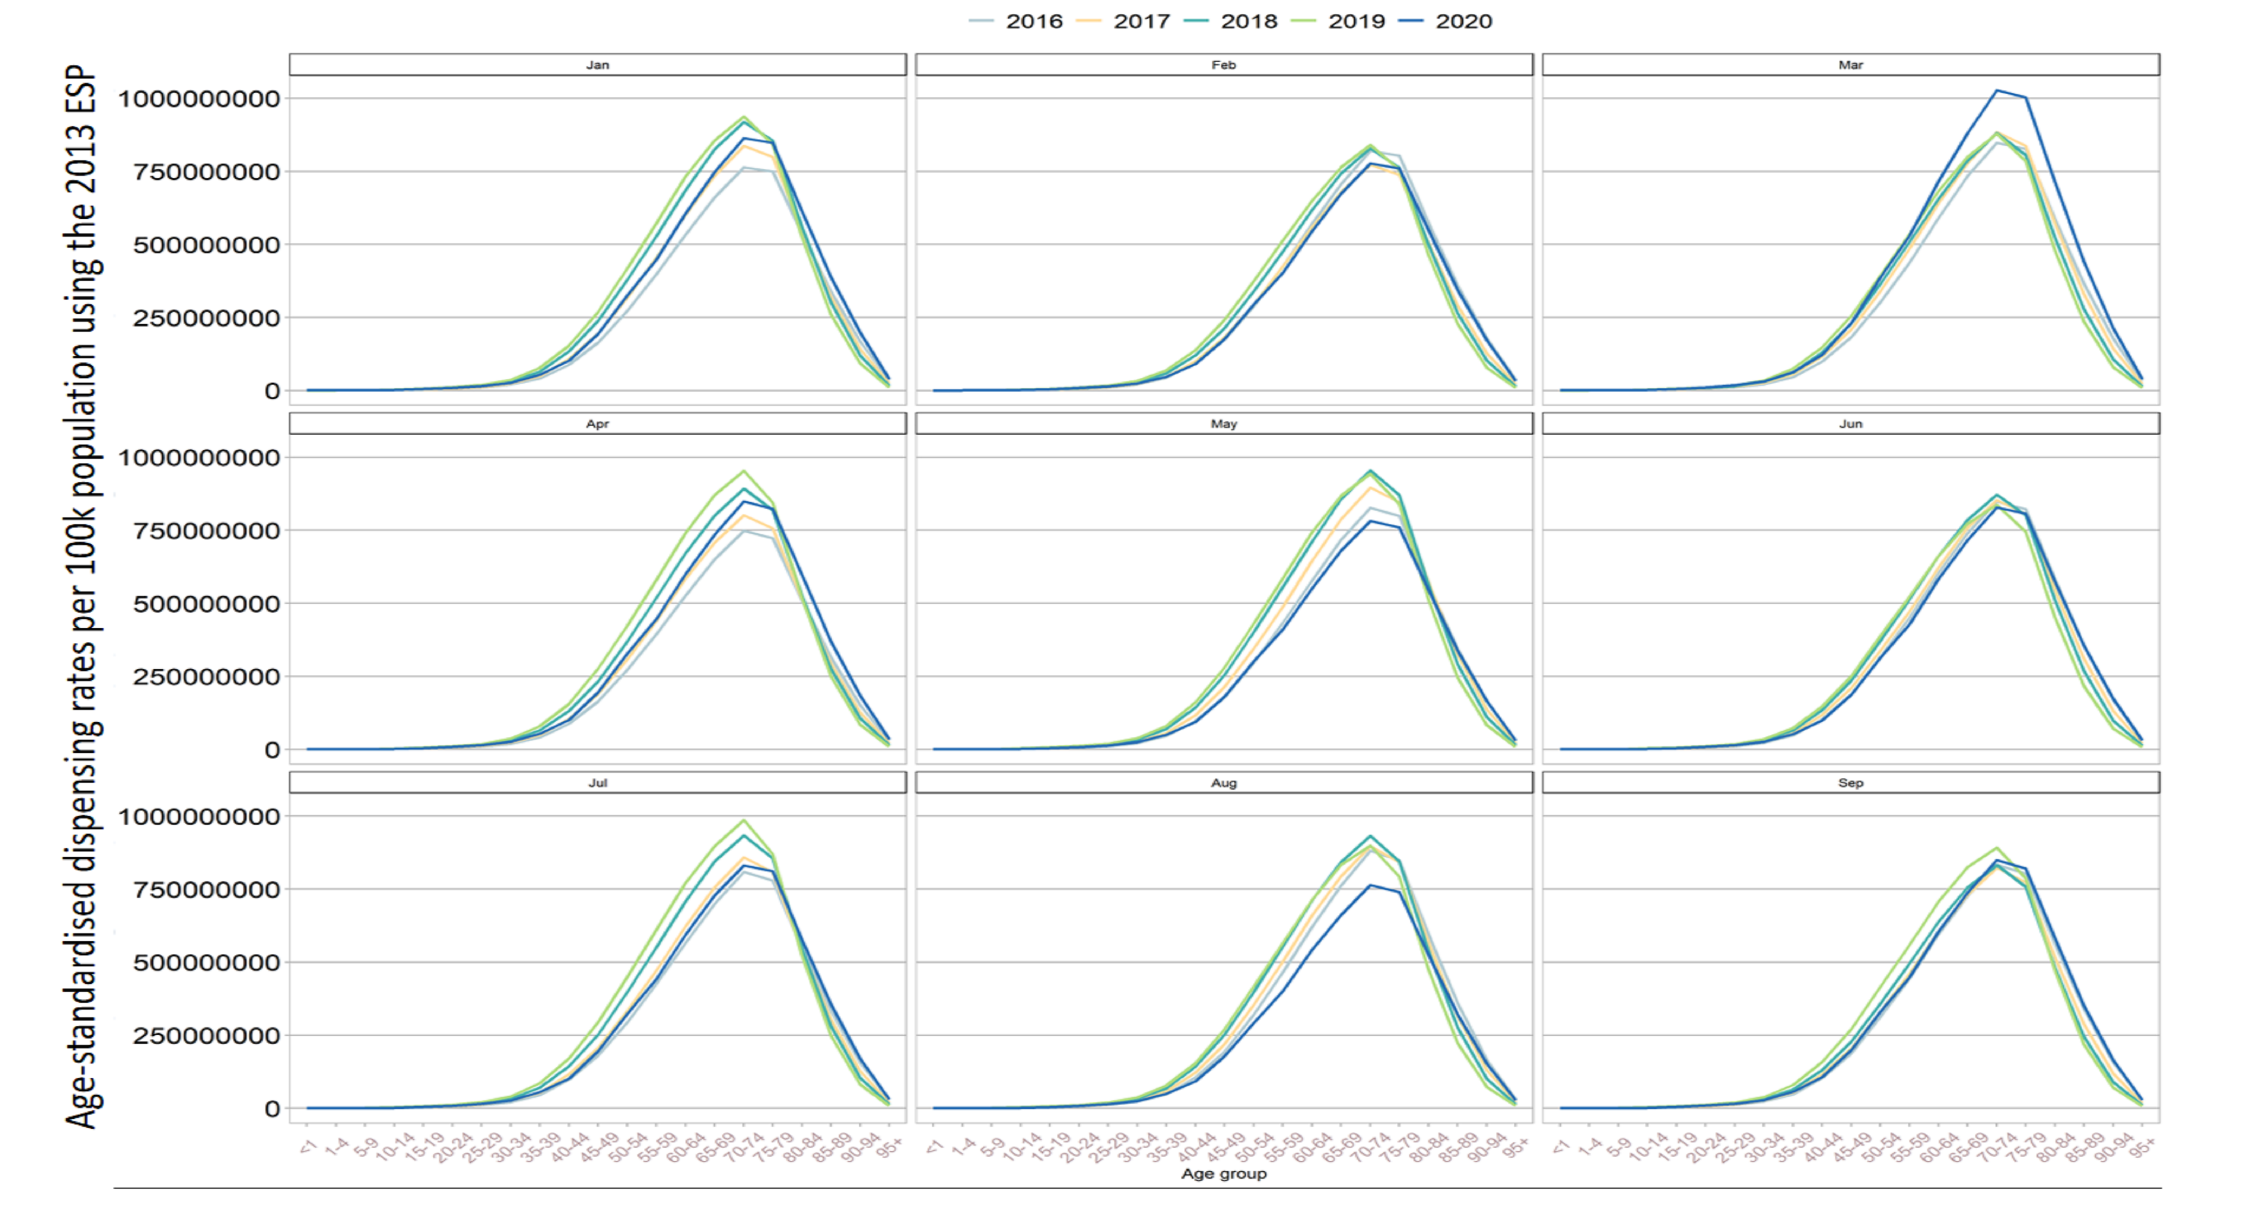


*Supplementary Figure 3.2- Age-standardized dispensing rates for* ***Central Nervous System*** *in per 100,000 pop’n per year and month*
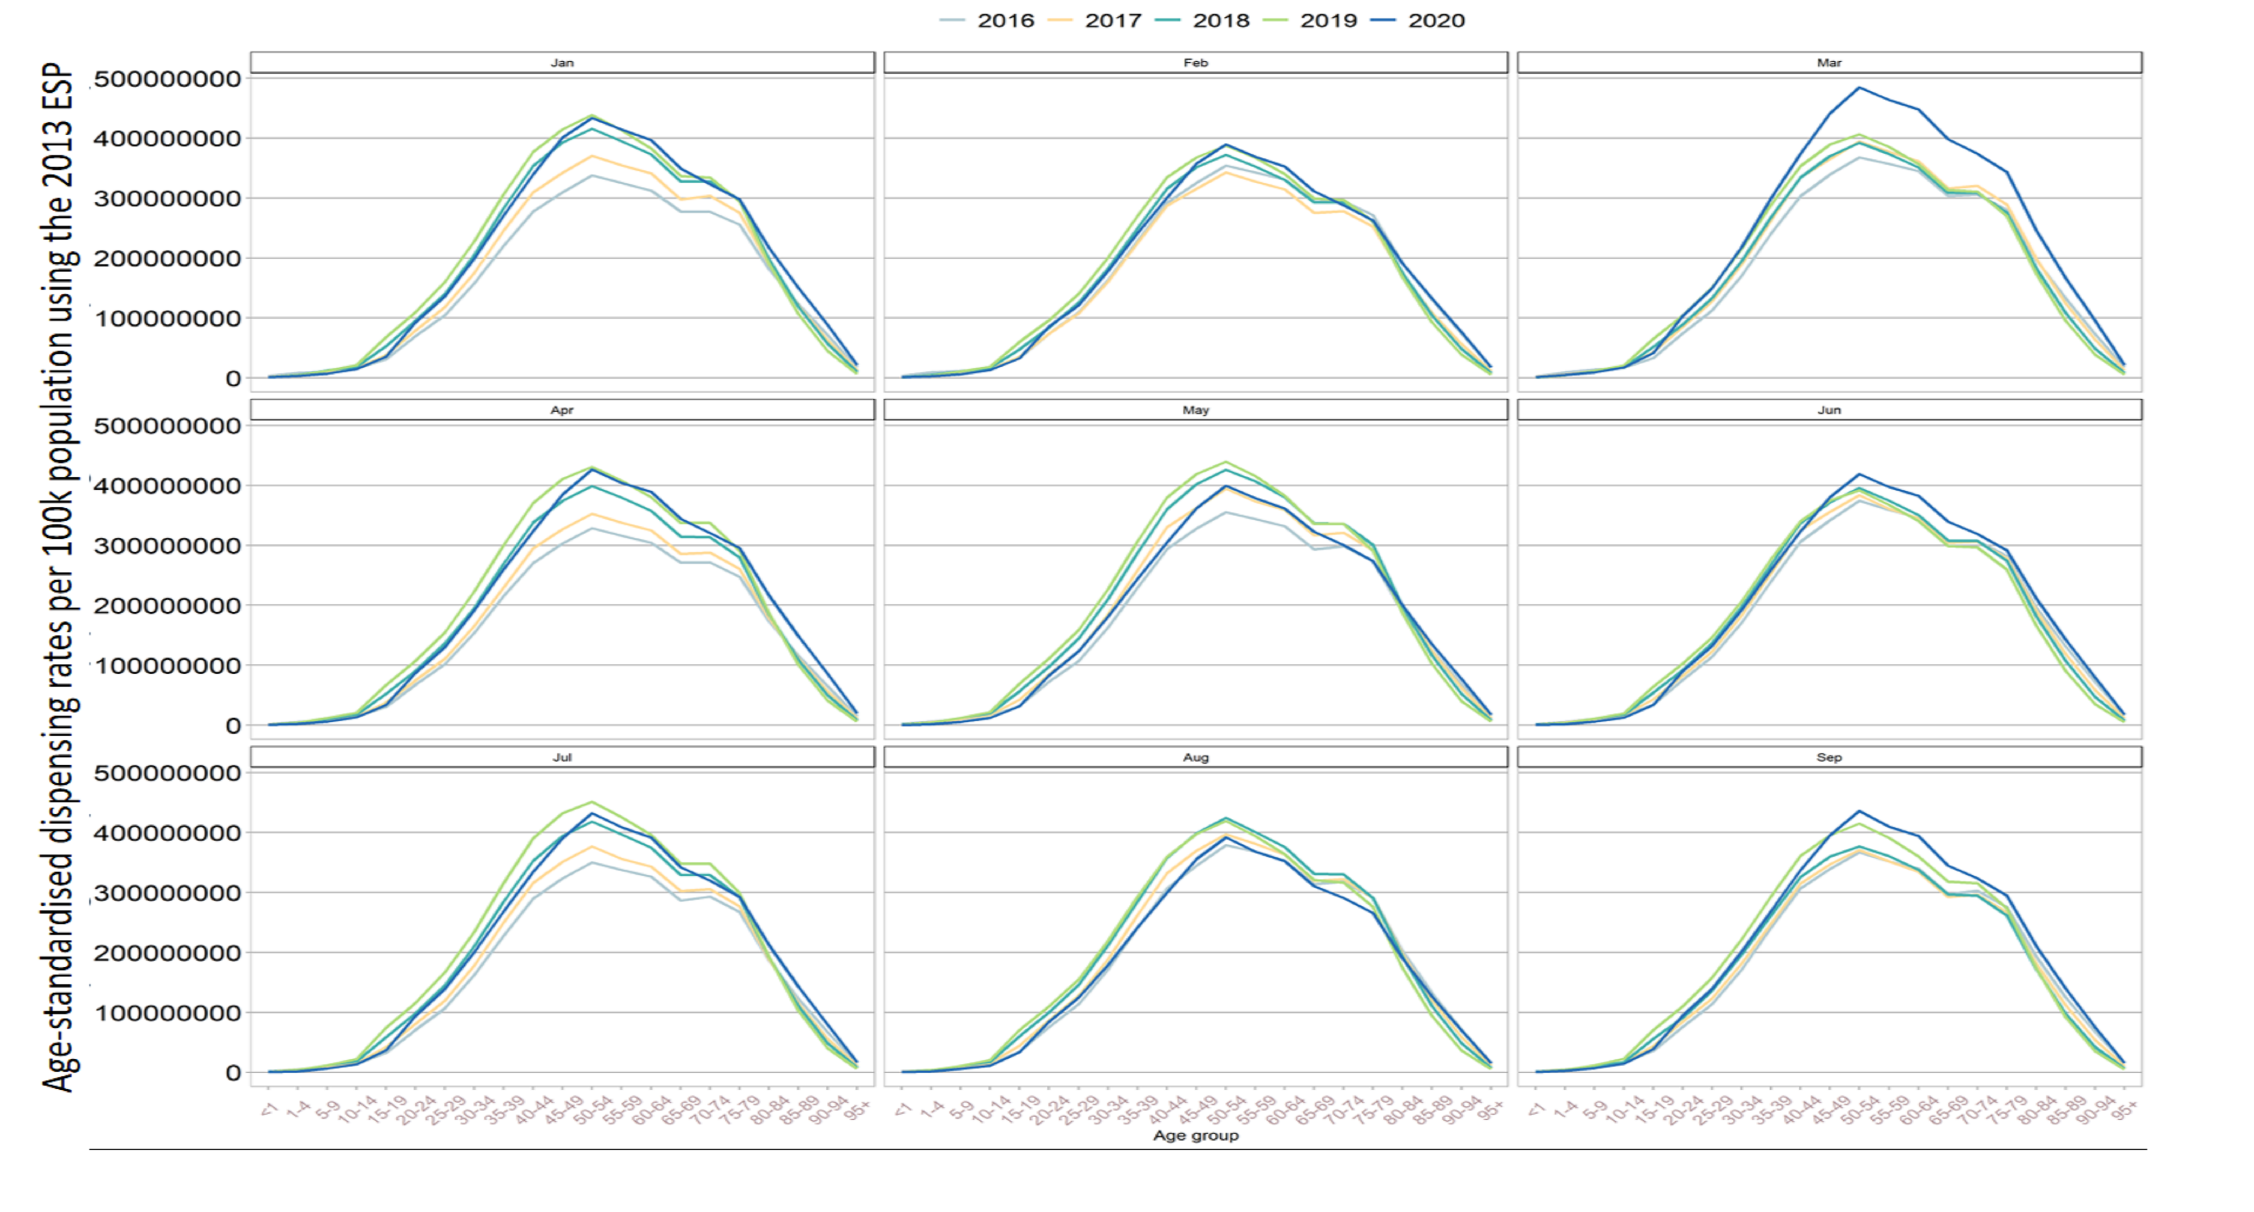


*Supplementary Figure3.3- Age-standardized dispensing rates for* ***Immunological Products & Vaccines*** *in per 100,000 pop’n per year and month*


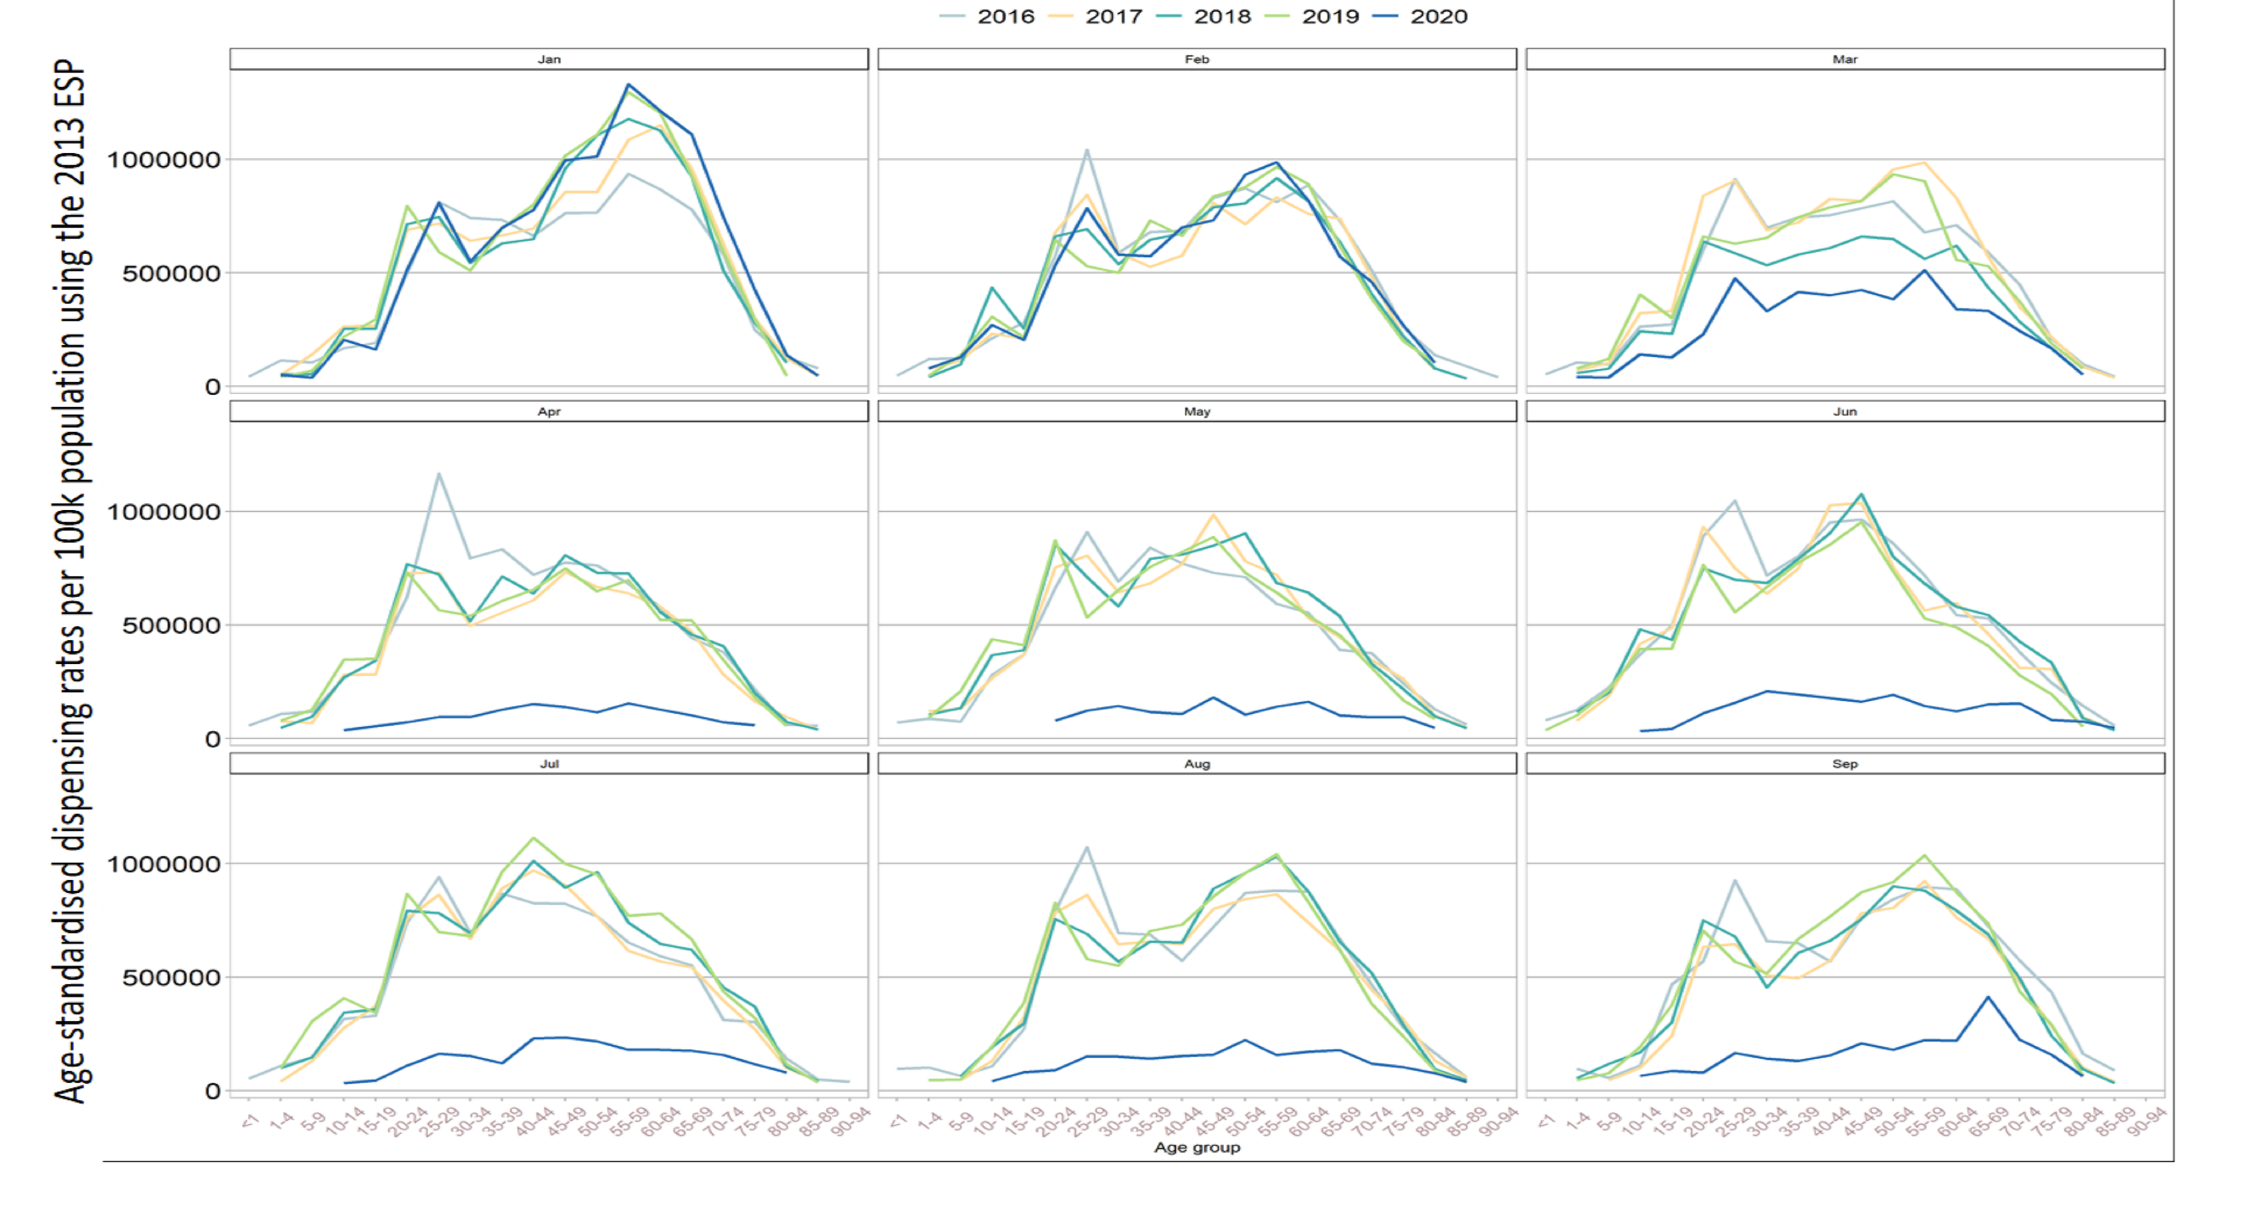

Supplement: Supplementary file 1 [file ed155fe329a25657aeab8450.docx]
